# Supplementary material for: Genetic Diversity and Population Structure among Arabian Horse Genealogical Lineages in Bulgaria
Source: MDPI journal article supplement (doi:10.3390/d16050281), 2024-05-09
Supplement: s1 [file s1]

Archive with 6 entries (6 files):
- Supplementary Table S1.pdf
- Supplementary Table S2.pdf
- Supplementary Table S3.pdf
- Supplementary Table S4.pdf
- Supplementary Table S5.pdf
- Supplementary Table S6.pdf
