# Supplementary material for: Genetic Diversity and Population Structure among Arabian Horse Genealogical Lineages in Bulgaria
Source: MDPI journal article supplement (doi:10.3390/d16050281), 2024-05-09
Supplement: s1 [file s1 › Supplementary Table S1.pdf]

**Supplementary Table S1.** Number of identified alleles (Na), number of effective alleles (Ne), Polymorphic Information Content (PIC), heterozygosity: observed (Ho), expected (He), Shannon's information index (I), Fixation index (F), and F (Null) - Null allele frequency estimated.

| <b>Locus</b> | <b>Na</b> | <b>Ne</b> | <b>PIC</b> | <b>Ho</b> | <b>He</b> | <b>I</b> | <b>F</b> | <b>F (Null)</b> |
|--------------|-----------|-----------|------------|-----------|-----------|----------|----------|-----------------|
| AHT4         | 5.78      | 3.36      | 0.73       | 0.79      | 0.69      | 1.39     | -0.16    | -0.0074         |
| ASB2         | 6.78      | 2.62      | 0.58       | 0.61      | 0.57      | 1.23     | -0.07    | -0.0038         |
| HMS2         | 6.33      | 3.37      | 0.75       | 0.76      | 0.67      | 1.37     | -0.15    | 0.0039          |
| HMS7         | 5.67      | 3.38      | 0.72       | 0.77      | 0.67      | 1.36     | -0.14    | 0.0007          |
| HTG6         | 3.55      | 2.59      | 0.59       | 0.66      | 0.60      | 1.03     | -0.09    | -0.0149         |
| AHT5         | 5.33      | 2.99      | 0.69       | 0.71      | 0.65      | 1.24     | -0.08    | -0.0042         |
| HMS3         | 6.44      | 3.97      | 0.77       | 0.85      | 0.75      | 1.54     | -0.13    | -0.0169         |
| HTG10        | 6.33      | 3.71      | 0.74       | 0.79      | 0.71      | 1.45     | -0.11    | -0.0061         |
| HTG7         | 3.11      | 1.80      | 0.33       | 0.43      | 0.39      | 0.69     | -0.07    | 0.0287          |
| HMS1         | 4.11      | 2.51      | 0.55       | 0.65      | 0.59      | 1.01     | -0.09    | -0.0310         |
| HMS6         | 4.89      | 2.42      | 0.49       | 0.60      | 0.57      | 1.04     | -0.04    | 0.0118          |
| HTG4         | 3.89      | 2.18      | 0.55       | 0.58      | 0.52      | 0.94     | -0.12    | -0.0332         |
| VHL20        | 5.33      | 3.29      | 0.69       | 0.79      | 0.69      | 1.33     | -0.16    | -0.0154         |
| Mean         | 5.19      | 2.94      | 0.63       | 0.69      | 0.62      | 1.20     | -0.11    | -0.0067         |
| SE           | 0.13      | 0.08      | 0.12       | 0.01      | 0.01      | 0.03     | 0.01     | 0.01663         |
