# Supplementary material for: Genetic Diversity and Population Structure among Arabian Horse Genealogical Lineages in Bulgaria
Source: MDPI journal article supplement (doi:10.3390/d16050281), 2024-05-09
Supplement: s1 [file s1 › Supplementary Table S2.pdf]

**Supplementary Table S2.** Fixation index ( $F_{IS}$ ,  $F_{IT}$ ,  $F_{ST}$ ), gene flow ( $Nm$ ), genetic diversity at each locus ( $G_{ST}$ ), total expected heterozygosity ( $H_T$ ), and Jost's estimate of differentiation ( $D$ ) among Arabian horse population.

| Locus | $F_{IS}^a$ | $F_{IT}^a$ | $F_{ST}^a$ | $Nm$ | $G_{ST}$ | $H_T$ | $D$   |
|-------|------------|------------|------------|------|----------|-------|-------|
| AHT4  | -0.152     | -0.041     | 0.096      | 2.35 | 0.084    | 0.760 | 0.238 |
| ASB2  | -0.064     | 0.013      | 0.072      | 3.20 | 0.059    | 0.618 | 0.099 |
| HMS2  | -0.136     | 0.027      | 0.144      | 1.49 | 0.133    | 0.783 | 0.365 |
| HMS7  | -0.134     | 0.013      | 0.130      | 1.67 | 0.119    | 0.776 | 0.330 |
| HTG6  | -0.089     | 0.006      | 0.087      | 2.62 | 0.074    | 0.663 | 0.144 |
| AHT5  | -0.085     | 0.017      | 0.094      | 2.42 | 0.081    | 0.722 | 0.197 |
| HMS3  | -0.132     | -0.058     | 0.065      | 3.59 | 0.053    | 0.799 | 0.196 |
| HTG10 | -0.109     | -0.017     | 0.083      | 2.76 | 0.071    | 0.779 | 0.226 |
| HTG7  | -0.099     | 0.020      | 0.108      | 2.06 | 0.096    | 0.441 | 0.079 |
| HMS1  | -0.100     | -0.027     | 0.066      | 3.53 | 0.053    | 0.635 | 0.096 |
| HMS6  | -0.052     | 0.020      | 0.069      | 3.38 | 0.056    | 0.613 | 0.091 |
| HTG4  | -0.124     | 0.021      | 0.129      | 1.69 | 0.117    | 0.602 | 0.170 |
| VHL20 | -0.155     | 0.035      | 0.103      | 2.17 | 0.092    | 0.770 | 0.266 |
| Mean  | -0.110     | -0.003     | 0.096      | 2.53 | 0.084    | 0.689 | 0.178 |
| SE    | 0.009      | 0.008      | 0.007      | 0.20 | 0.008    | 0.029 | 0.026 |

<sup>a</sup> Wright's statistics according to Weir and Cockerham [49].
