# Supplementary material for: Genetic Diversity and Population Structure among Arabian Horse Genealogical Lineages in Bulgaria
Source: MDPI journal article supplement (doi:10.3390/d16050281), 2024-05-09
Supplement: s1 [file s1 › Supplementary Table S3.pdf]

**Supplementary Table S3.** Hardy Weinberg (HW) equilibrium test in all studied microsatellite loci by Arabian horse lineages.

| Locus | Lineage |         |       |          |          |        |          |         |       |
|-------|---------|---------|-------|----------|----------|--------|----------|---------|-------|
|       | SAK I   | LAT     | SEA   | IBR      | SHA      | DJE    | KUH      | BAI     | SAR   |
| AHT4  | 0.408   | 0.024*  | 0.240 | 0.484    | 0.263    | 0.992  | 0.364    | 0.735   | 0.893 |
| ASB2  | 0.432   | 0.992   | 1.000 | 0.777    | 0.367    | 0.299  | 0.997    | 0.010** | 0.907 |
| HMS2  | 0.660   | 0.806   | 0.931 | 0.509    | 0.377    | 0.996  | 0.378    | 0.904   | 0.463 |
| HMS7  | 0.013*  | 0.003** | 0.815 | 0.004*** | 0.415    | 0.264  | 0.747    | 0.951   | 0.559 |
| HTG6  | 0.531   | 0.506   | 0.852 | 0.754    | 0.136    | 0.678  | 0.002*** | 0.823   | 0.162 |
| AHT5  | 0.200   | 0.496   | 0.472 | 0.899    | 0.068    | 0.788  | 0.648    | 0.975   | 0.577 |
| HMS3  | 0.036*  | 0.834   | 0.511 | 0.058    | 0.404    | 0.834  | 0.101    | 0.332   | 0.605 |
| HTG10 | 0.658   | 0.016*  | 0.232 | 0.907    | 0.403    | 0.022* | 0.767    | 0.778   | 0.621 |
| HTG7  | 0.477   | 0.128   | 0.967 | 0.055    | 0.014*   | 0.684  | 0.534    | 0.393   | 0.523 |
| HMS1  | 0.856   | 0.610   | 0.982 | 0.018*   | 0.107    | 0.616  | 0.831    | 0.627   | 0.604 |
| HMS6  | 0.588   | 0.719   | 0.841 | 0.995    | 0.005*** | 0.621  | 1.000    | 0.813   | 0.441 |
| HTG4  | 0.012*  | 0.906   | 0.815 | 0.280    | 0.294    | 0.734  | 0.329    | 0.535   | 0.475 |
| VHL20 | 0.070   | 0.775   | 0.701 | 0.083    | 0.722    | 0.883  | 0.208    | 0.623   | 0.478 |

Significant at  $p < 0.005^*$ ,  $p < 0.01^{**}$ ,  $p < 0.001^{***}$ . Arabian horse lineages abbreviations could be seen in Table 1.
