# Supplementary material for: Genetic Diversity and Population Structure among Arabian Horse Genealogical Lineages in Bulgaria
Source: MDPI journal article supplement (doi:10.3390/d16050281), 2024-05-09
Supplement: s1 [file s1 › Supplementary Table S4.pdf]

**Supplementary Table S4.** Analysis of molecular variance (AMOVA) and F-Statistic of Arabian horse lineages based on genotyping of 13 microsatellite markers.

| Source                              | Degree of freedom | Sum of squares | Estimated variance | Percentage of variation | F-Statistics      |
|-------------------------------------|-------------------|----------------|--------------------|-------------------------|-------------------|
| Among sire lines                    | 8                 | 8.647          | 0.006              | 1%                      | $F_{ST}$ 0.008*** |
| Among individuals within sire lines | 528               | 245.693        | 0.007              | 1%                      | $F_{IS}$ 0.098**  |
| Within individuals                  | 537               | 242.500        | 0.452              | 97%                     | $F_{IT}$ 0.014*** |
| Total                               | 1073              | 496.840        | 0.464              | 100%                    |                   |

\*\*p < 0.01; \*\*\*p < 0.001
