# Supplementary material for: Genetic Diversity and Population Structure among Arabian Horse Genealogical Lineages in Bulgaria
Source: MDPI journal article supplement (doi:10.3390/d16050281), 2024-05-09
Supplement: s1 [file s1 › Supplementary Table S5.pdf]

**Supplementary Table S5.** The Arabian horse individuals' assignment into 3 clusters depending on Q value at K = 3.

| Lineage | Clusters     |              |              |
|---------|--------------|--------------|--------------|
|         | 1            | 2            | 3            |
| SAK I   | 0.008        | <b>0.982</b> | 0.010        |
| LAT     | 0.012        | 0.010        | <b>0.977</b> |
| SEA     | 0.011        | <b>0.979</b> | 0.010        |
| IBR     | <b>0.980</b> | 0.010        | 0.010        |
| SHA     | 0.012        | 0.008        | <b>0.980</b> |
| DJE     | 0.010        | 0.019        | <b>0.972</b> |
| KUH     | <b>0.982</b> | 0.008        | 0.009        |
| BAI     | 0.016        | <b>0.968</b> | 0.016        |
| SAR     | <b>0.943</b> | 0.016        | 0.041        |

The highest value in each Arabian horse lineages is in bold. Population abbreviations are pointed out in Table 1.
