# Supplementary material for: Genetic Diversity and Population Structure among Arabian Horse Genealogical Lineages in Bulgaria
Source: MDPI journal article supplement (doi:10.3390/d16050281), 2024-05-09
Supplement: s1 [file s1 › Supplementary Table S6.pdf]

**Supplementary Table S6.** Pairwise  $F_{ST}$  statistics (below diagonal) and Nei's genetic distances (above diagonal) among nine Arabian horse lineages.

| <b>SAK I</b> | <b>LAT</b> | <b>SEA</b> | <b>IBR</b> | <b>SHA</b> | <b>DJE</b> | <b>KUH</b> | <b>BAI</b> | <b>SAR</b> |              |
|--------------|------------|------------|------------|------------|------------|------------|------------|------------|--------------|
| 0.000        | 0.193      | 0.117      | 0.114      | 0.238      | 0.146      | 0.098      | 0.145      | 0.240      | <b>SAK I</b> |
| 0.042        | 0.000      | 0.350      | 0.150      | 0.187      | 0.143      | 0.152      | 0.254      | 0.297      | <b>LAT</b>   |
| 0.036        | 0.089      | 0.000      | 0.202      | 0.303      | 0.319      | 0.214      | 0.249      | 0.282      | <b>SEA</b>   |
| 0.031        | 0.044      | 0.060      | 0.000      | 0.259      | 0.204      | 0.035      | 0.143      | 0.198      | <b>IBR</b>   |
| 0.051        | 0.041      | 0.081      | 0.065      | 0.000      | 0.252      | 0.221      | 0.289      | 0.318      | <b>SHA</b>   |
| 0.035        | 0.036      | 0.087      | 0.054      | 0.061      | 0.000      | 0.218      | 0.288      | 0.451      | <b>DJE</b>   |
| 0.025        | 0.040      | 0.060      | 0.011      | 0.053      | 0.055      | 0.000      | 0.186      | 0.185      | <b>KUH</b>   |
| 0.035        | 0.058      | 0.071      | 0.044      | 0.065      | 0.067      | 0.050      | 0.000      | 0.296      | <b>BAI</b>   |
| 0.055        | 0.067      | 0.076      | 0.057      | 0.071      | 0.101      | 0.051      | 0.072      | 0.000      | <b>SAR</b>   |

Arabian horse lineages abbreviations could be seen in Table 1.
